# Supplementary material for: Environmental Acceptability of Geotechnical Composites from Recycled Materials: Comparative Study of Laboratory and Field Investigations
Source: MDPI journal article supplement (doi:10.3390/ijerph20032014), 2023-01-21
Supplement: s1 [file s1]

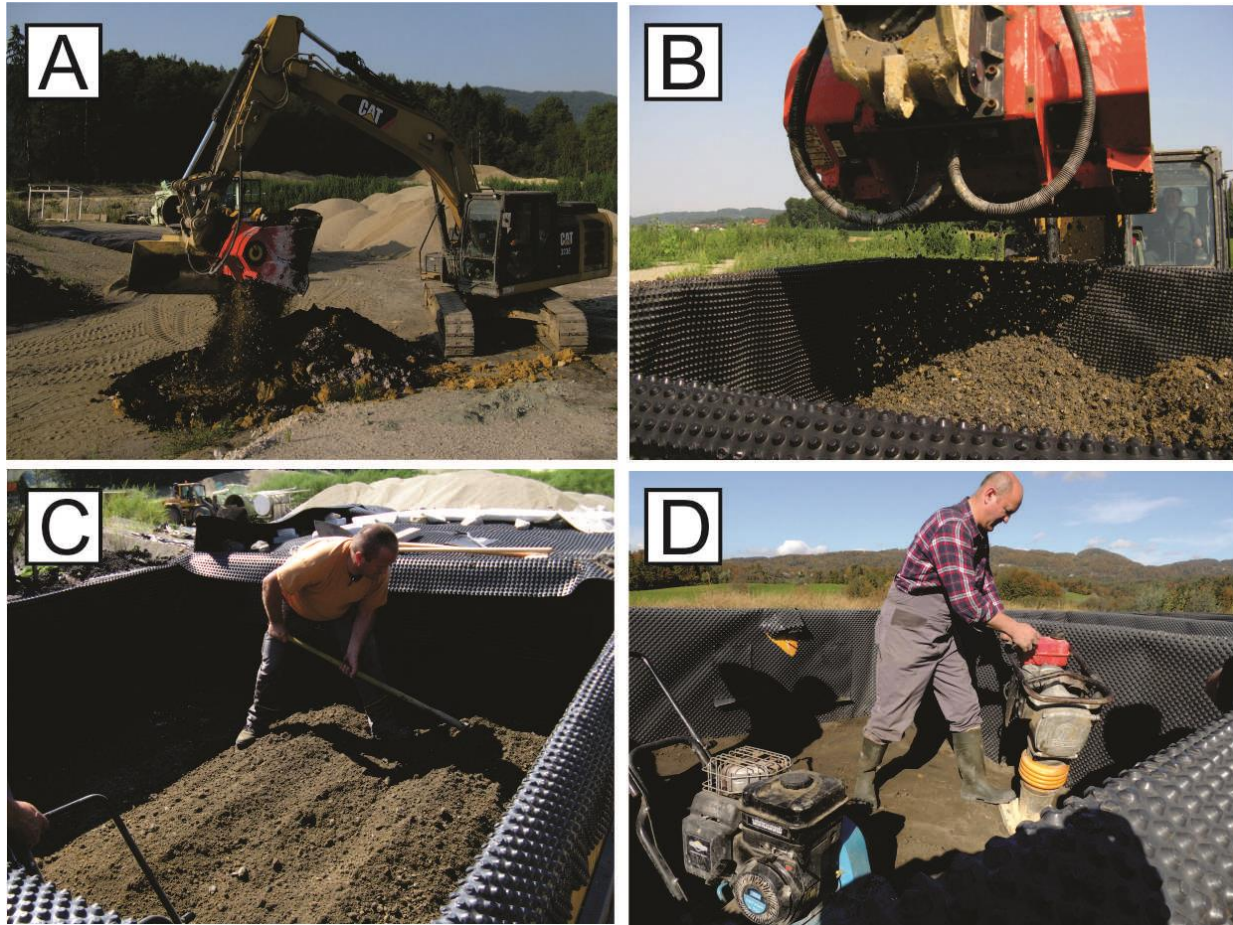

**Figure s3** Different stages of a field preparation of geotechnical composites for the lysimeter experiments: Preparation of a composite, according to predetermined dry mass ratios and with addition of optimal amount of water, by the use of excavator mixing bucket (A), filling of the lysimeter with a layer of a composite (B), spreading of a composite in a layer of uniform thickness of 30 cm (C), and the final installation of the layer of a composite by a vibration compactor in box lysimeters (D).
