# Supplementary material for: Environmental Acceptability of Geotechnical Composites from Recycled Materials: Comparative Study of Laboratory and Field Investigations
Source: MDPI journal article supplement (doi:10.3390/ijerph20032014), 2023-01-21
Supplement: s1 [file s1]

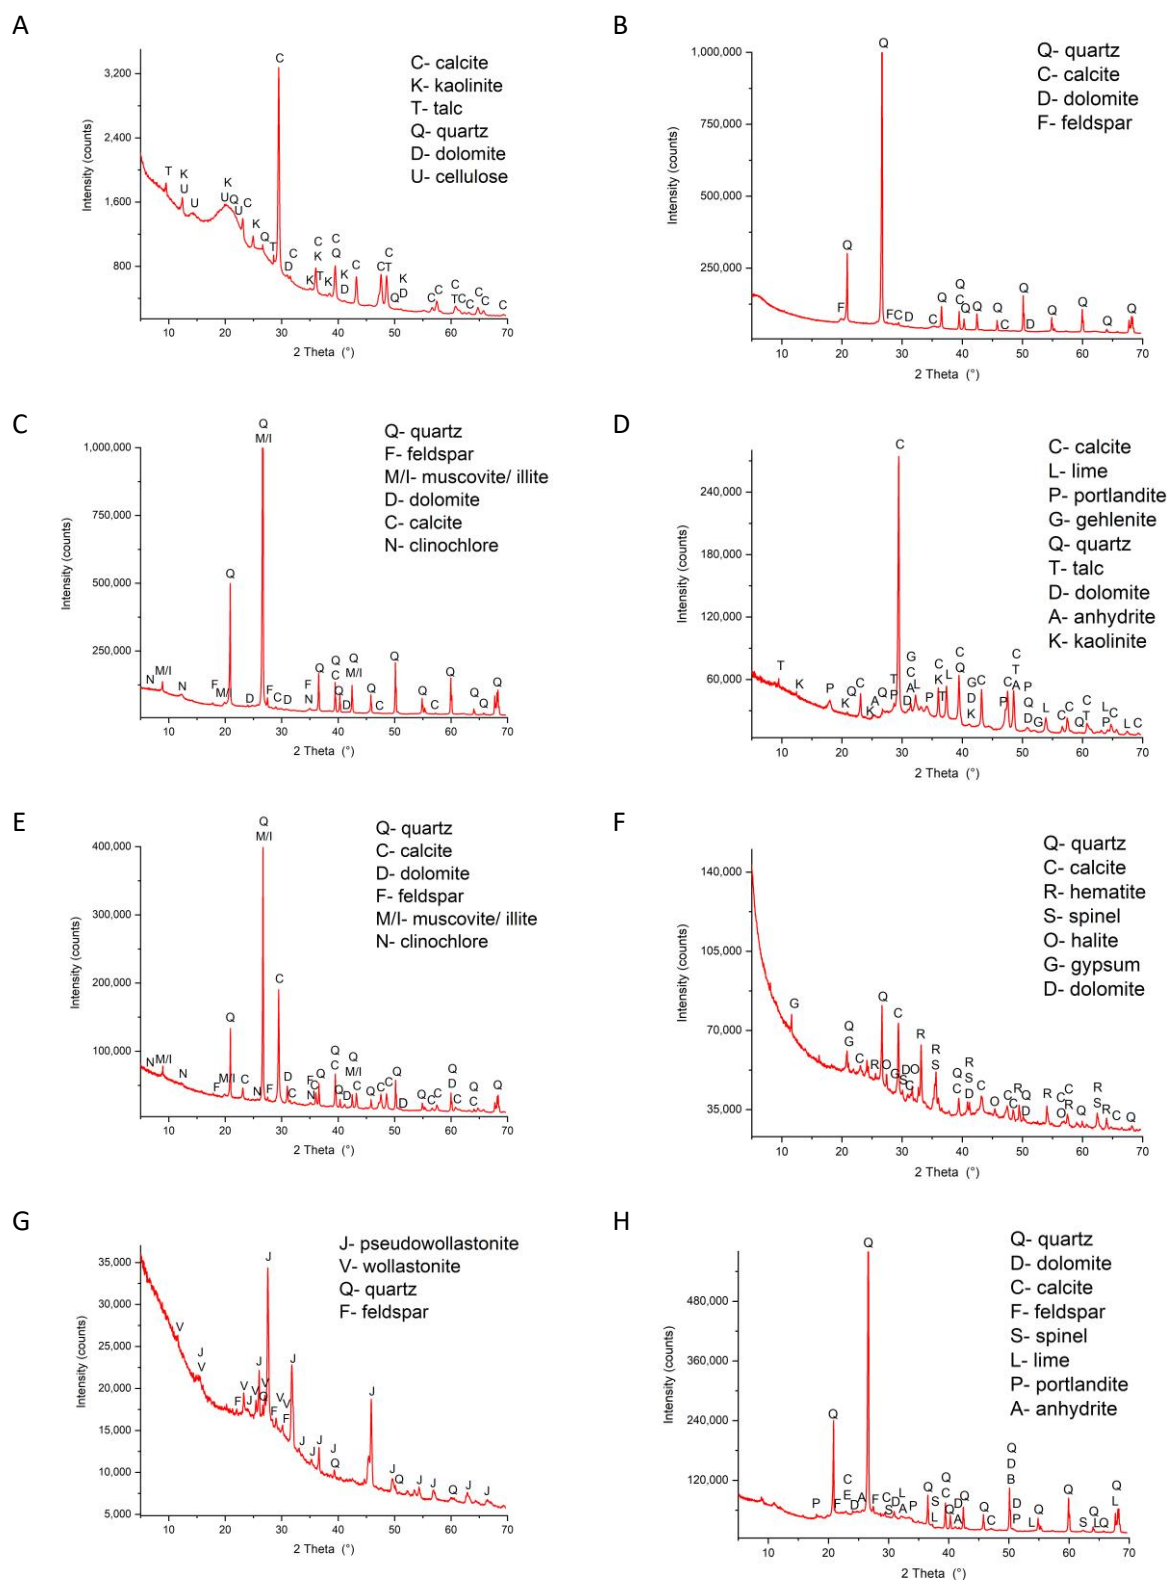

**Figure S5.** XRD patterns of raw materials (A) Paper mill sludge, (B) Foundry sand, (C) Mine waste, (D) Paper ash, (E) Digestate, (F) Bottom ash from incineration of waste, (G) Foundry slag and (H) Coal ash.
