# Supplementary material for: Environmental Acceptability of Geotechnical Composites from Recycled Materials: Comparative Study of Laboratory and Field Investigations
Source: MDPI journal article supplement (doi:10.3390/ijerph20032014), 2023-01-21
Supplement: s1 [file s1]

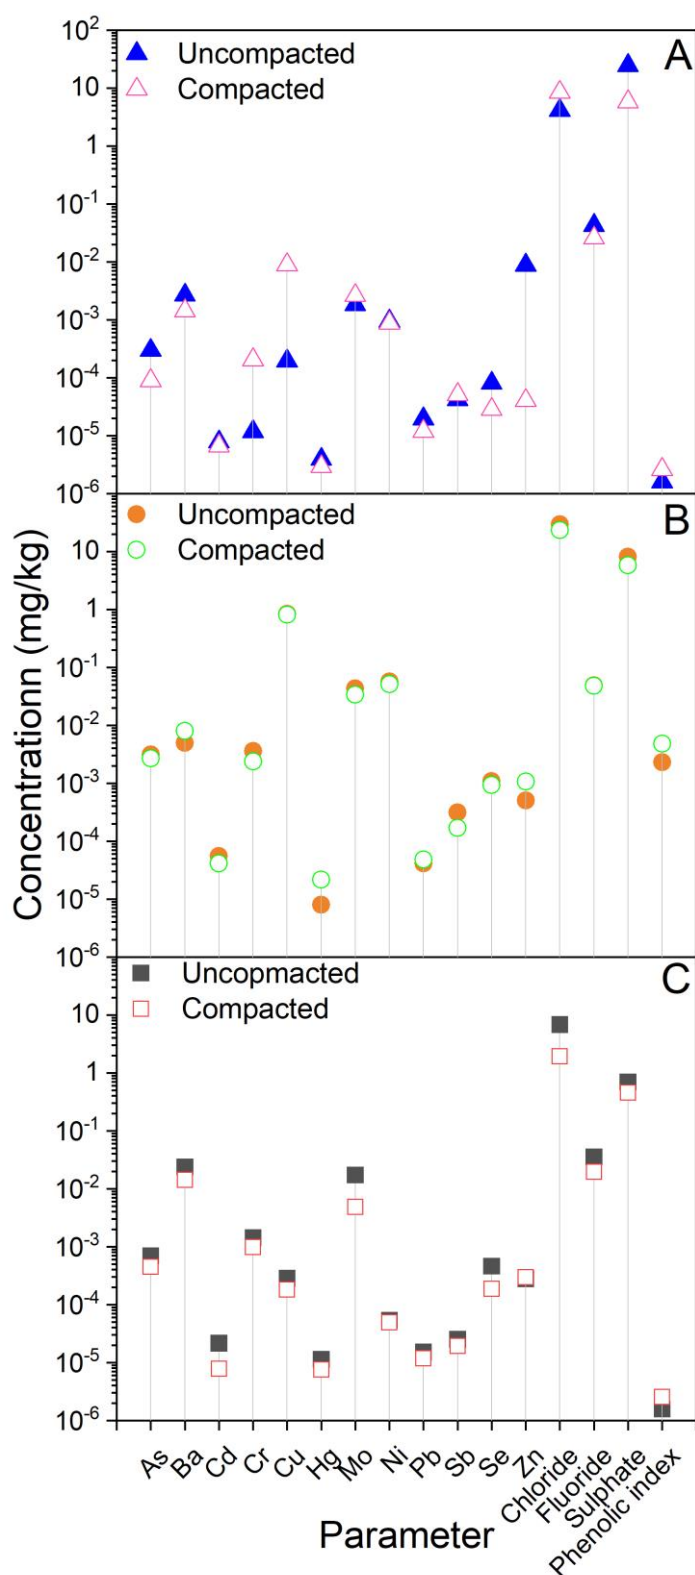

**Figure S8.** Concentrations of potentially hazardous substances in percolated water from lysimeters installed below uncompacted and compacted geotechnical composites (A) Composite 1, (B) Composite 2 and (C) Composite 3. Results represent average concentrations of elements and anions obtained from 18 (Composites 1 and 3) or 17 (Composite 2) samplings in a period from June 2020 to June 2021.
