# Supplementary material for: Environmental Acceptability of Geotechnical Composites from Recycled Materials: Comparative Study of Laboratory and Field Investigations
Source: MDPI journal article supplement (doi:10.3390/ijerph20032014), 2023-01-21
Supplement: s1 [file s1]

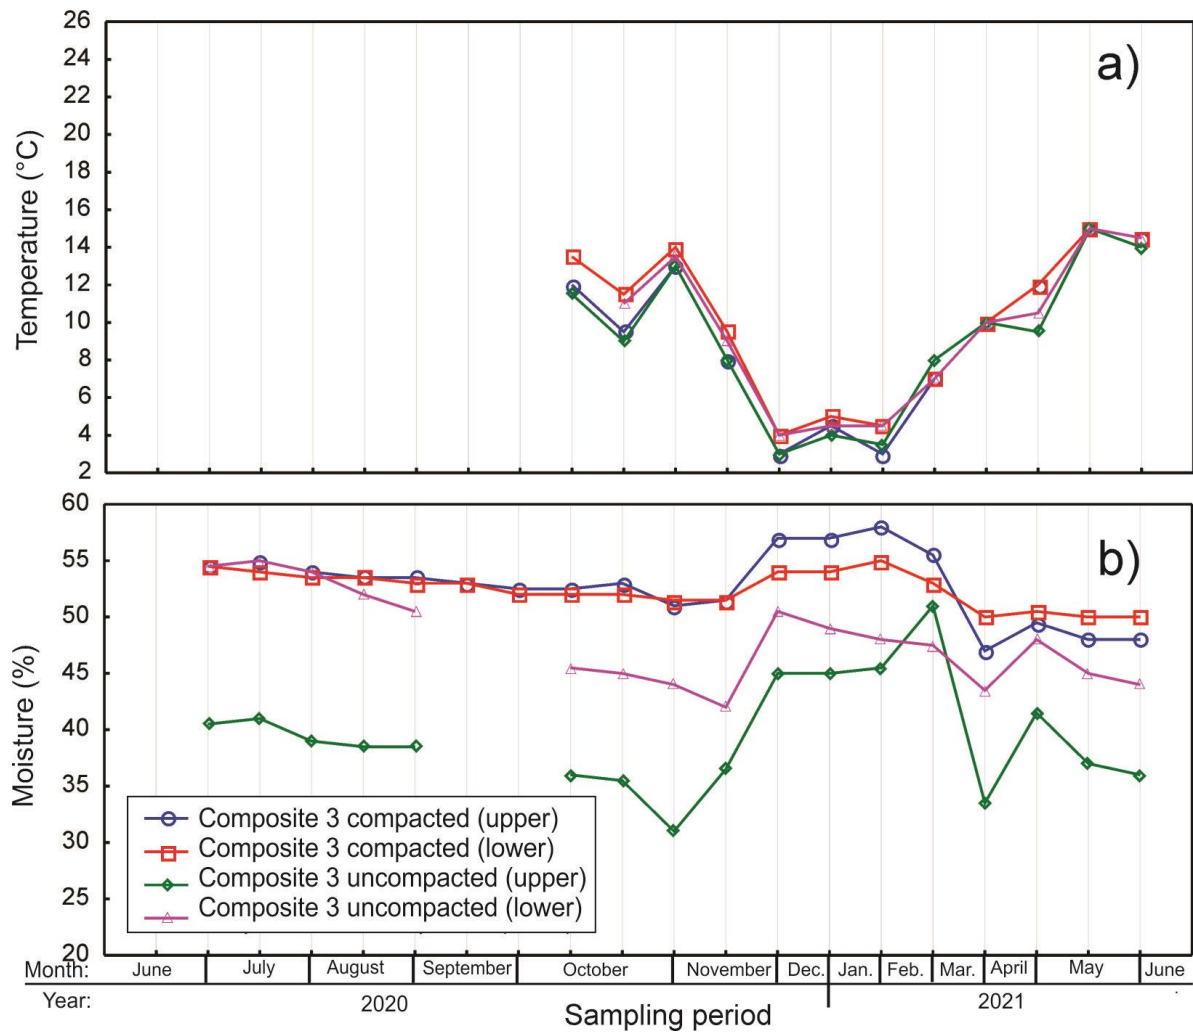

**Figure S4c** Temperature (A) and moisture (B) of un-compacted and compacted Composite 3 (measurements from upper and lower sensor).
