# Supplementary material for: Environmental Acceptability of Geotechnical Composites from Recycled Materials: Comparative Study of Laboratory and Field Investigations
Source: MDPI journal article supplement (doi:10.3390/ijerph20032014), 2023-01-21
Supplement: s1 [file s1]

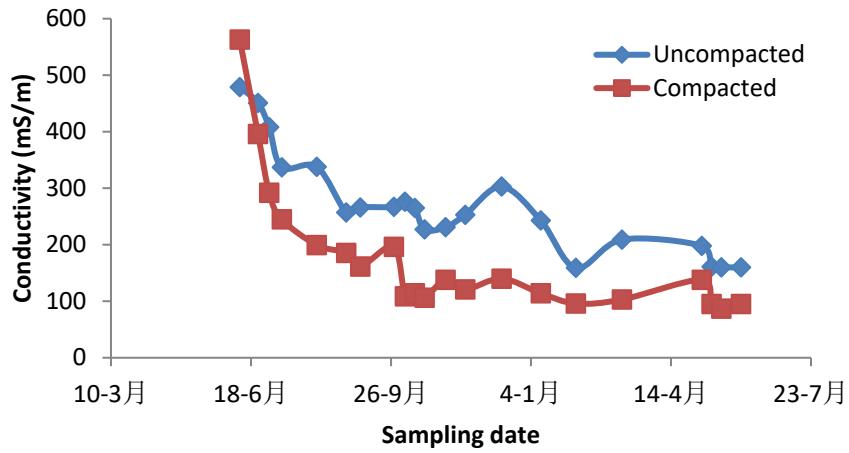

A

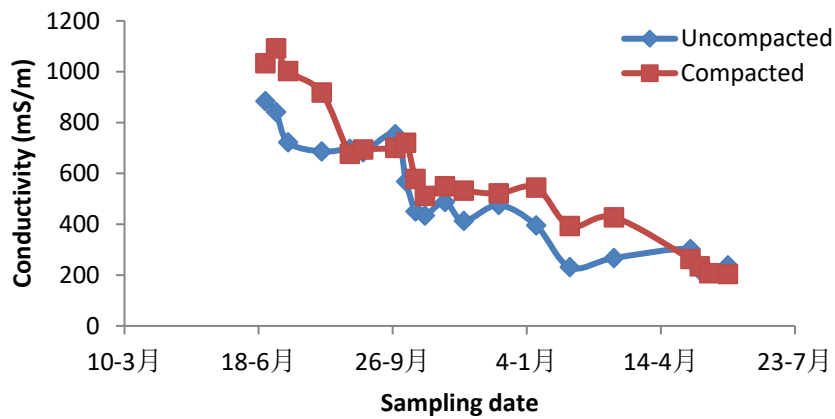

B

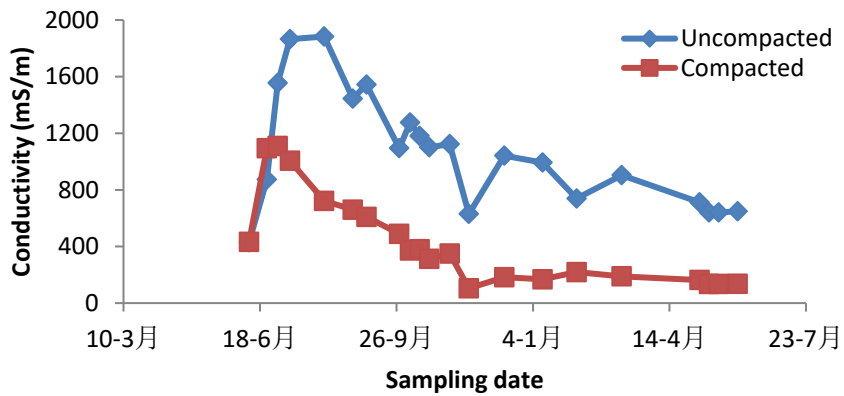

C

**Figure S7** Conductivity values (mS/m) of percolates from (A) Composite 1, (B) Composite 2 and (C) Composite 3 as function of different sampling period. Results represent values obtained from samplings in a period from June 2020 to June 2021.
