# Supplementary material for: Environmental Acceptability of Geotechnical Composites from Recycled Materials: Comparative Study of Laboratory and Field Investigations
Source: MDPI journal article supplement (doi:10.3390/ijerph20032014), 2023-01-21
Supplement: s1 [file s1]

**Table S1**

Basic information about the input raw materials used in the experiments.

| Type of input raw material                                                            | Abbreviation used in the text | European waste code* | Source of a raw material                                           | Contact information of the source company                                          |
|---------------------------------------------------------------------------------------|-------------------------------|----------------------|--------------------------------------------------------------------|------------------------------------------------------------------------------------|
| Paper-mill sludge                                                                     | PMS                           | 03 03 10             | Paper mill for production of label and packaging paper             | Brigl & Bergmeister GmbH –Vevče, Papirniška pot 25, 1261 Ljubljana, Slovenia       |
| Paper ash                                                                             | PA                            | 10 01 01             | Paper mill for production of newsprint and packaging paper         | VIPAP Videm Krško d.d., Tovarniška ulica 18, Krško, 8270 Krško                     |
| Coal fly ash                                                                          | CA                            | 10 01 02             |                                                                    |                                                                                    |
| Solid-waste incineration bottom ash                                                   | SWIA                          | 19 01 12             | Chemical products factory and incineration of waste                | Albaugh TKI d.o.o. (Formerly PINUS TKI), Grajski trg 21, Rače, 2327 Rače, Slovenia |
| Foundry slag                                                                          | FSL                           | 10 09 03             | Foundry for production and mechanical processing of metal castings | Livar d.d., Ljubljanska cesta 43, 1295 Ivančna Gorica, Slovenia                    |
| Foundry sand                                                                          | FS                            | 10 09 08             |                                                                    |                                                                                    |
| Digestate from the mechanical-biological anaerobic treatment of municipal solid waste | DI                            | 19 06 04             | Public utility company – Regional Waste Management Centre – RCERO  | JP VOKA SNAGA d.o.o., Vodovodna cesta 90, 1000 Ljubljana, Slovenia                 |
| Mining waste                                                                          | MW                            | 01 04 09             | Mining company for the production and processing of silica sands   | Termit d.d., Drtija 51, 1251 Moravče, Slovenia                                     |

\* European Union's List of Wastes (European Commission, 2000)

**Table S2**

Maximum reference dry density and optimal moisture content of geotechnical composites

| Parameter                                             | Composite 1 | Composite 2 | Composite 3 |
|-------------------------------------------------------|-------------|-------------|-------------|
| Maximum reference dry density<br>(Mg/m <sup>3</sup> ) | 1.83        | 1.12        | 1.48        |
| Optimal water content (%)                             | 13.8        | 34.0        | 22.6        |

**Table S3a**  
Precipitation, volume of collected lysimetric water, concentrations of PTEs and anions (dry mass basis), pH and conductivity in lysimetric water from uncompacted Composite 1.

| Parameter                     | Sampling period (2020) |             |            |            |            |            |            |            |             |                   |                   |              |              |               | Sampling period (2021) |            |            |            |            |             |            |          | Average result | Standard deviation |         |
|-------------------------------|------------------------|-------------|------------|------------|------------|------------|------------|------------|-------------|-------------------|-------------------|--------------|--------------|---------------|------------------------|------------|------------|------------|------------|-------------|------------|----------|----------------|--------------------|---------|
|                               | 4.6.-10.6.             | 10.6.-23.6. | 23.6.-1.7. | 1.7.-10.7. | 10.7.-4.8. | 4.8.-25.8. | 25.8.-4.9. | 4.9.-28.9. | 28.9.-6.10. | 6.10.-13.10.      | 13.10.-20.10.     | 20.10.-4.11. | 4.11.-18.11. | 18.11.-14.12. | 14.12.-11.1.           | 11.1.-5.2. | 5.2.-10.3. | 10.3.-6.5. | 6.5.-13.5. | 13.5.-20.5. | 20.5.-3.6. |          |                |                    |         |
| Precipitation (mm)            | 76                     | 86          | 48         | 63         | 182        | 66         | 51         | 120        | 79          | 61                | 28                | 22           | 44           | 45            | 165                    | 66         | 45         | 150        | 47         | 75          | 77         | 76       | 43             |                    |         |
| Volume of collected water (L) | 470                    | 650         | 310        | 460        | 1100       | 500        | 310        | 780        | 600         | 400               | 100               | 160          | 250          | 430           | 1200                   | 520        | 625        | 890        | 400        | 460         | 550        | 526      | 230            |                    |         |
| As (mg/kg)                    | 0,0006                 | 0,0006      | 0,0003     | 0,0004     | 0,0010     | 0,0003     | 0,0002     | 0,0005     | 0,0003      |                   |                   | 0,00009      | 0,0001       | 0,0002        |                        | 0,0001     | 0,0002     | 0,0002     | 0,00009    | 0,00008     | 0,0001     | 0,0003   | 0,0002         |                    |         |
| Ba (mg/kg)                    | 0,0052                 | 0,0033      | 0,0012     | 0,0025     | 0,0053     | 0,0031     | 0,0018     | 0,0058     | 0,0049      |                   |                   | 0,0005       | 0,0013       | 0,0022        |                        | 0,0018     | 0,0024     | 0,0015     | 0,0004     | 0,0025      | 0,0025     | 0,0027   | 0,0017         |                    |         |
| Cd (mg/kg)                    | 0,000007               | 0,00001     | 0,000005   | 0,000007   | 0,00002    | 0,000007   | 0,000005   | 0,00001    | 0,000009    |                   |                   | 0,000002     | 0,000004     | 0,000006      |                        | 0,000008   | 0,000009   | 0,00001    | 0,000006   | 0,000007    | 0,00001    | 0,000008 | 0,000003       |                    |         |
| Cr total (mg/kg)              | 0,00002                | 0,00001     | 0,000007   | 0,00001    | 0,00004    | 0,000007   | 0,000005   | 0,00001    | 0,00001     |                   |                   | 0,000005     | 0,000006     | 0,000010      |                        | 0,000008   | 0,000009   | 0,00002    | 0,000009   | 0,000007    | 0,0000     | 0,00001  | 0,000009       |                    |         |
| Cu (mg/kg)                    | 0,00033                | 0,0004      | 0,0002     | 0,0003     | 0,0005     | 0,0002     | 0,00006    | 0,0002     | 0,0002      |                   |                   | 0,00007      | 0,00009      | 0,0002        |                        | 0,00009    | 0,0002     | 0,0002     | 0,00008    | 0,0001      | 0,00       | 0,0002   | 0,0001         |                    |         |
| Hg (mg/kg)                    | 0,000003               | 0,000005    | 0,000002   | 0,000003   | 0,000008   | 0,000004   | 0,000002   | 0,000006   | 0,000004    |                   |                   | 0,000001     | 0,000002     | 0,000003      |                        | 0,000004   | 0,000005   | 0,000007   | 0,000003   | 0,000003    | 0,000004   | 0,000004 | 0,000002       |                    |         |
| Mo (mg/kg)                    | 0,0019                 | 0,0027      | 0,0015     | 0,0019     | 0,0047     | 0,0024     | 0,0013     | 0,0034     | 0,0024      | Technical problem | Technical problem | 0,0007       | 0,0008       | 0,0016        | Technical problem      | 0,0012     | 0,0017     | 0,0025     | 0,0007     | 0,0007      | 0,001      | 0,0018   | 0,0011         |                    |         |
| Ni (mg/kg)                    | 0,0017                 | 0,002       | 0,0007     | 0,0011     | 0,0027     | 0,0009     | 0,0005     | 0,0013     | 0,0012      |                   |                   | 0,0003       | 0,0004       | 0,0008        |                        |            | 0,0005     | 0,0007     | 0,0007     | 0,0004      | 0,0005     | 0,0006   | 0,0006         | 0,0009             | 0,0006  |
| Pb (mg/kg)                    | 0,00002                | 0,00002     | 0,00001    | 0,00002    | 0,00004    | 0,00002    | 0,00001    | 0,00003    | 0,00002     |                   |                   | 0,000006     | 0,000009     | 0,00002       |                        |            | 0,00002    | 0,00002    | 0,00003    | 0,00001     | 0,00002    | 0,00002  | 0,00002        | 0,00002            | 0,00002 |
| Sb (mg/kg)                    | 0,00005                | 0,00007     | 0,00003    | 0,00004    | 0,0001     | 0,00003    | 0,00002    | 0,00006    | 0,00005     | 0,00001           | 0,00001           | 0,00001      | 0,00003      |               | 0,00003                | 0,00005    | 0,00007    | 0,00003    | 0,00003    | 0,00003     | 0,0000     | 0,00004  | 0,00002        |                    |         |
| Se (mg/kg)                    | 0,00023                | 0,0002      | 0,00006    | 0,0001     | 0,0003     | 0,00008    | 0,00003    | 0,0001     | 0,00006     |                   |                   | 0,00002      | 0,00001      | 0,00004       |                        | 0,00003    | 0,00004    | 0,00010    | 0,00001    | 0,00002     | 0,0000     | 0,00008  | 0,00008        |                    |         |
| Zn (mg/kg)                    | 0,023                  | 0,012       | 0,0006     | 0,012      | 0,019      | 0,0019     | 0,00004    | 0,012      | 0,018       |                   |                   | 0,0003       | 0,0061       | 0,0077        |                        | 0,0097     | 0,0074     | 0,0012     | 0,0002     | 0,019       | 0,0094     | 0,0088   | 0,0074         |                    |         |
| Chloride (mg/kg)              | 7,3                    | 8,2         | 12,7       | 4,4        | 11,4       | 5,2        | 2,3        | 4,1        | 3,8         |                   |                   | 1,1          | 6,0          | 1,3           |                        | 0,77       | 1,5        | 2,3        | 0,51       | 0,44        | 0,7        | 4,1      | 3,7            |                    |         |
| Fluoride (mg/kg)              | 0,043                  | 0,049       | 0,030      | 0,044      | 0,10       | 0,046      | 0,031      | 0,08       | 0,05        |                   |                   | 0,01         | 0,02         | 0,03          |                        | 0,036      | 0,047      | 0,058      | 0,031      | 0,026       | 0,042      | 0,043    | 0,021          |                    |         |
| Sulfate (mg/kg)               | 48,6                   | 54,1        | 22,1       | 28,4       | 71,9       | 25,8       | 12,9       | 38,0       | 25,6        |                   |                   | 6,9          | 10,9         | 12,1          |                        | 10,2       | 17,9       | 29,8       | 8,6        | 7,9         | 8,6        | 24,5     | 18,4           |                    |         |
| phenol index                  |                        |             |            |            |            |            |            |            |             |                   |                   |              |              |               |                        |            |            |            |            |             |            |          |                |                    |         |
| pH                            | 7,2                    | 7,5         | 7,8        | 8,0        | 7,6        | 7,6        | 7,8        | 7,7        | 7,3         | 7,8               | 8,9               | 8,1          | 7,9          | 7,7           | 8,4                    | 7,5        | 8,0        | 8,0        | 7,7        | 7,0         | 7,3        | 7,8      | 0,42           |                    |         |
| Conductivity (mS/m)           | 479                    | 451         | 408        | 337        | 338        | 257        | 266        | 267        | 276         | 265               | 227               | 231          | 253          | 303           | 243                    | 159        | 209        | 198        | 161        | 160         | 160        | 269      | 92             |                    |         |
| L/S                           | 0,035                  | 0,048       | 0,023      | 0,034      | 0,082      | 0,037      | 0,023      | 0,058      | 0,045       | 0,030             | 0,007             | 0,012        | 0,019        | 0,032         | 0,089                  | 0,039      | 0,046      | 0,066      | 0,030      | 0,034       | 0,041      |          |                |                    |         |
| L/S (cumulative)              | 0,035                  | 0,083       | 0,106      | 0,141      | 0,222      | 0,259      | 0,283      | 0,341      | 0,385       | 0,415             | 0,422             | 0,434        | 0,453        | 0,485         | 0,574                  | 0,613      | 0,659      | 0,725      | 0,755      | 0,789       | 0,830      |          |                |                    |         |

**Table S3a (continued)**  
Precipitation, volume of collected lysimetric water, concentrations of PTEs and anions (dry mass basis), pH and conductivity in lysimetric water from compacted Composite 1.

| Parameter                     | Sampling period (2020) |             |            |            |            |            |            |            |             |              |               |              |              |               | Sampling period (2021) |            |            |            |            |             |            |          | Average result | Standard deviation |
|-------------------------------|------------------------|-------------|------------|------------|------------|------------|------------|------------|-------------|--------------|---------------|--------------|--------------|---------------|------------------------|------------|------------|------------|------------|-------------|------------|----------|----------------|--------------------|
|                               | 4.6.-10.6.             | 10.6.-23.6. | 23.6.-1.7. | 1.7.-10.7. | 10.7.-4.8. | 4.8.-25.8. | 25.8.-4.9. | 4.9.-28.9. | 28.9.-6.10. | 6.10.-13.10. | 13.10.-20.10. | 20.10.-4.11. | 4.11.-18.11. | 18.11.-14.12. | 14.12.-11.1.           | 11.1.-5.2. | 5.2.-10.3. | 10.3.-6.5. | 6.5.-13.5. | 13.5.-20.5. | 20.5.-3.6. |          |                |                    |
| Precipitation (mm)            | 76                     | 86          | 48         | 63         | 182        | 66         | 51         | 120        | 79          | 61           | 28            | 22           | 44           | 45            | Technical problem      | 165        | 66         | 45         | 150        | 47          | 75         | 77       | 76             | 43                 |
| Volume of collected water (L) | 360                    | 550         | 220        | 340        | 770        | 390        | 280        | 610        | 570         | 470          | 270           | 100          | 170          | 410           |                        | 700        | 520        | 570        | 690        | 300         | 350        | 350      | 415            | 176                |
| As (mg/kg)                    | 0,00004                | 0,00005     | 0,00002    | 0,00003    | 0,00005    | 0,00002    | 0,00001    | 0,00004    | 0,00002     | 0,00002      | 0,000007      | 0,00000      | 0,000005     | 0,00002       |                        | 0,00001    | 0,00001    | 0,00002    | 0,00001    | 0,00001     | 0,00001    | 0,00009  | 0,0003         |                    |
| Ba (mg/kg)                    | 0,0019                 | 0,0008      | 0,0006     | 0,0013     | 0,0031     | 0,0018     | 0,0012     | 0,0025     | 0,0025      | 0,002        | 0,000600      | 0,0004       | 0,0005       | 0,0013        |                        | 0,0010     | 0,0015     | 0,0009     | 0,0002     | 0,001       | 0,00007    | 0,0009   |                |                    |
| Cd (mg/kg)                    | 0,000004               | 0,00001     | 0,000002   | 0,000004   | 0,00001    | 0,000004   | 0,000003   | 0,00001    | 0,000006    | 0,000005     | 0,000003      | 0,000001     | 0,000002     | 0,000004      |                        | 0,000006   | 0,000006   | 0,00001    | 0,000003   | 0,000004    | 0,000004   | 0,00007  | 0,00009        |                    |
| Cr total (mg/kg)              | 0,00003                | 0,00002     | 0,000007   | 0,00002    | 0,00003    | 0,00001    | 0,000006   | 0,00002    | 0,00002     | 0,00001      | 0,000003      | 0,000003     | 0,000006     | 0,000013      |                        | 0,000006   | 0,00002    | 0,00003    | 0,000006   | 0,000010    | 0,0002     | 0,0008   |                |                    |
| Cu (mg/kg)                    | 0,0002                 | 0,0002      | 0,00008    | 0,0001     | 0,0002     | 0,00008    | 0,00005    | 0,0001     | 0,00007     | 0,00006      | 0,000028      | 0,00001      | 0,00002      | 0,00003       |                        | 0,00004    | 0,00004    | 0,00006    | 0,00002    | 0,0000      | 0,009      | 0,038    |                |                    |
| Hg (mg/kg)                    | 0,000002               | 0,000003    | 0,000001   | 0,000002   | 0,000004   | 0,000002   | 0,000002   | 0,000003   | 0,000003    | 0,000001     | 0,000001      | 0,000001     | 0,000001     | 0,000002      |                        | 0,000003   | 0,000003   | 0,000004   | 0,000002   | 0,000010    | 0,000003   | 0,000002 |                |                    |
| Mo (mg/kg)                    | 0,0007                 | 0,0012      | 0,0005     | 0,0008     | 0,0014     | 0,0008     | 0,00046    | 0,0014     | 0,0009      | 0,0007       | 0,0004        | 0,0002       | 0,0002       | 0,0007        |                        | 0,0009     | 0,0009     | 0,0013     | 0,0004     | 0,0003      | 0,0026     | 0,0079   |                |                    |
| Ni (mg/kg)                    | 0,0003                 | 0,0004      | 0,0001     | 0,0002     | 0,0004     | 0,0002     | 0,0001     | 0,0003     | 0,0002      | 0,0002       | 0,00008       | 0,00003      | 0,00004      | 0,0001        |                        | 0,00009    | 0,00010    | 0,0001     | 0,00004    | 0,00005     | 0,0009     | 0,0030   |                |                    |
| Pb (mg/kg)                    | 0,00001                | 0,00002     | 0,00001    | 0,00001    | 0,00002    | 0,00001    | 0,00001    | 0,00002    | 0,00002     | 0,00001      | 0,000007      | 0,000003     | 0,000005     | 0,00001       |                        | 0,00001    | 0,00002    | 0,00002    | 0,00001    | 0,00001     | 0,000012   | 0,000005 |                |                    |
| Sb (mg/kg)                    | 0,00002                | 0,00004     | 0,00001    | 0,00002    | 0,00005    | 0,00002    | 0,00001    | 0,00002    | 0,00002     | 0,00001      | 0,000006      | 0,000003     | 0,000003     | 0,00001       |                        | 0,00001    | 0,00001    | 0,00002    | 0,00001    | 0,00001     | 0,00005    | 0,0001   |                |                    |
| Se (mg/kg)                    | 0,00004                | 0,00003     | 0,00001    | 0,00001    | 0,00004    | 0,00001    | 0,00001    | 0,00001    | 0,00001     | 0,000008     | 0,000004      | 0,000002     | 0,000002     | 0,00001       |                        | 0,00001    | 0,00001    | 0,00002    | 0,00000    | 0,00001     | 0,00003    | 0,00006  |                |                    |
| Zn (mg/kg)                    | 0,0001                 | 0,00002     | 0,00001    | 0,00001    | 0,00002    | 0,0000     | 0,00001    | 0,00002    | 0,00006     | 0,000005     | 0,000007      | 0,000003     | 0,000002     | 0,00001       |                        | 0,00001    | 0,00001    | 0,00002    | 0,000008   | 0,00006     | 0,00004    | 0,00007  |                |                    |
| Chloride (mg/kg)              | 14,0                   | 21,9        | 2,3        | 9,5        | 14,3       | 11,0       | 4,9        | 16,1       | 6,8         | 3,6          | 2,9           | 1,4          | 2,2          | 5,6           |                        | 5,0        | 5,0        | 10,0       | 2,8        | 2,4         | 8,5        | 6,1      |                |                    |
| Fluoride (mg/kg)              | 0,022                  | 0,036       | 0,016      | 0,022      | 0,05       | 0,029      | 0,016      | 0,04       | 0,03        | 0,036        | 0,017         | 0,01         | 0,01         | 0,02          | 0,029                  | 0,034      | 0,037      | 0,015      | 0,016      | 0,03        | 0,01       |          |                |                    |
| Sulfate (mg/kg)               | 18,3                   | 18,6        | 3,4        | 7,3        | 8,0        | 4,2        | 2,3        | 5,6        | 3,0         | 2,59         | 1,25          | 0,7          | 1,6          | 2,6           | 1,6                    | 2,0        | 5,3        | 1,6        | 1,4        | 5,8         | 5,9        |          |                |                    |
| phenol index                  |                        |             |            |            | 0,0002     |            |            |            |             |              | 0,0001        |              | 0,00005      |               |                        |            |            |            | 0,00010    | 0,00012     | 0,00008    |          |                |                    |
| pH                            | 7,5                    | 7,9         | 8,1        | 8,0        | 8,1        | 8,1        | 8,0        | 8,0        | 7,5         | 7,8          | 8,1           | 7,9          | 8,0          | 8,1           | 8,3                    | 8,0        | 8,3        | 8,2        | 8,1        | 7,9         | 8,1        | 0,2      |                |                    |
| Conductivity (mS/m)           | 563                    | 396         | 292        | 245        | 199,4      | 185,6      | 161,3      | 196,1      | 108,6       | 114          | 106,1         | 138          | 120,8        | 140           | 114                    | 96         | 103        | 138        | 95         | 87          | 95         | 176      | 117            |                    |
| L/S                           | 0,020                  | 0,030       | 0,012      | 0,019      | 0,042      | 0,021      | 0,015      | 0,033      | 0,031       | 0,026        | 0,015         | 0,005        | 0,009        | 0,022         | 0,038                  | 0,028      | 0,031      | 0,038      | 0,016      | 0,019       | 0,019      |          |                |                    |
| L/S (cumulative)              | 0,020                  | 0,050       | 0,062      | 0,080      | 0,122      | 0,144      | 0,159      | 0,192      | 0,223       | 0,249        | 0,264         | 0,269        | 0,278        | 0,301         | 0,339                  | 0,367      | 0,398      | 0,436      | 0,453      | 0,472       | 0,491      |          |                |                    |

**Table S3b**  
Precipitation, volume of collected lysimetric water, concentrations of PTEs and anions (dry mass basis), pH and conductivity in lysimetric water from uncompacted Composite 2.

| Parameter                     | Sampling period (2020) |            |            |            |            |            |            |             |              |               |                   |              |               | Sampling period (2021) |            |            |                   |            |             |            | Average result | Standard deviation |
|-------------------------------|------------------------|------------|------------|------------|------------|------------|------------|-------------|--------------|---------------|-------------------|--------------|---------------|------------------------|------------|------------|-------------------|------------|-------------|------------|----------------|--------------------|
|                               | 10.6.-23.6.            | 23.6.-1.7. | 1.7.-10.7. | 10.7.-4.8. | 4.8.-25.8. | 25.8.-4.9. | 4.9.-28.9. | 28.9.-6.10. | 6.10.-13.10. | 13.10.-20.10. | 20.10.-4.11.      | 4.11.-18.11. | 18.11.-14.12. | 14.12.-11.1.           | 11.1.-5.2. | 5.2.-10.3. | 10.3.-6.5.        | 6.5.-13.5. | 13.5.-20.5. | 20.5.-3.6. |                |                    |
| Precipitation (mm)            | 86                     | 48         | 63         | 182        | 66         | 51         | 120        | 79          | 61           | 28            | 22                | 44           | 45            | 165                    | 66         | 45         | 150               | 47         | 75          | 77         | 76             | 45                 |
| Volume of collected water (L) | 340                    | 300        | 455        | 1100       | 490        | 325        | 760        | 640         | 410          | 225           | 100               | 205          | 430           | 1300                   | 580        | 640        | 900               | 420        | 350         | 660        | 532            | 303                |
| As (mg/kg)                    | 0,0033                 | 0,0029     | 0,0043     | 0,011      | 0,0034     | 0,0020     | 0,0051     | 0,0045      | 0,0024       | 0,0011        |                   | 0,0013       | 0,0025        |                        | 0,002200   | 0,0023     |                   | 0,0012     | 0,0012      | 0,0021     | 0,0031         | 0,0024             |
| Ba (mg/kg)                    | 0,0082                 | 0,0036     | 0,0055     | 0,042      | 0,0075     | 0,0004     | 0,0002     | 0,0029      | 0,0037       | 0,0017        |                   | 0,0020       | 0,00009       |                        | 0,000900   | 0,0015     |                   | 0,0005     | 0,0014      | 0,0021     | 0,0049         | 0,0099             |
| Cd (mg/kg)                    | 0,00003                | 0,00003    | 0,00005    | 0,0001     | 0,00006    | 0,00006    | 0,0001     | 0,0001      | 0,00005      | 0,00004       |                   | 0,00003      | 0,00004       |                        | 0,00006    | 0,00006    |                   | 0,00003    | 0,00003     | 0,00005    | 0,00005        | 0,00002            |
| Cr total (mg/kg)              | 0,0027                 | 0,0023     | 0,0037     | 0,0086     | 0,0036     | 0,0026     | 0,0051     | 0,0052      | 0,0033       | 0,0015        |                   | 0,0019       | 0,0034        |                        | 0,0034     | 0,0038     |                   | 0,0037     | 0,0021      | 0,0044     | 0,0036         | 0,0017             |
| Cu (mg/kg)                    | 0,95                   | 0,9        | 1,2        | 4,1        | 1,0        | 0,57       | 1,2        | 1,2         | 0,58         | 0,018         |                   | 0,26         | 0,57          |                        | 0,34       | 0,35       |                   | 0,20       | 0,24        | 0,43       | 0,83           | 0,93               |
| Hg (mg/kg)                    | 0,000004               | 0,000003   | 0,000005   | 0,00001    | 0,000005   | 0,000004   | 0,000008   | 0,000007    | 0,000004     | 0,000002      |                   | 0,000002     | 0,000005      |                        | 0,00002    | 0,00001    |                   | 0,00002    | 0,00008     | 0,00001    | 0,000008       | 0,000006           |
| Mo (mg/kg)                    | 0,03                   | 0,028      | 0,042      | 0,11       | 0,053      | 0,034      | 0,077      | 0,071       | 0,041        | 0,021         |                   | 0,020        | 0,041         |                        | 0,039      | 0,038      |                   | 0,011      | 0,019       | 0,052      | 0,043          | 0,025              |
| Ni (mg/kg)                    | 0,071                  | 0,066      | 0,089      | 0,26       | 0,071      | 0,043      | 0,083      | 0,084       | 0,04         | 0,0037        | Technical problem | 0,016        | 0,038         |                        | 0,023      | 0,024      | Technical problem | 0,014      | 0,013       | 0,025      | 0,057          | 0,059              |
| Pb (mg/kg)                    | 0,00001                | 0,00001    | 0,00002    | 0,00006    | 0,00007    | 0,00006    | 0,00004    | 0,00004     | 0,00007      | 0,0001        |                   | 0,00002      | 0,00002       |                        | 0,00004    | 0,00004    |                   | 0,00002    | 0,00001     | 0,00002    | 0,00004        | 0,00003            |
| Sb (mg/kg)                    | 0,00007                | 0,0001     | 0,0002     | 0,0004     | 0,0003     | 0,0002     | 0,0007     | 0,0005      | 0,0004       | 0,0002        |                   | 0,0002       | 0,0004        |                        | 0,0004     | 0,0005     |                   | 0,0004     | 0,0001      | 0,0002     | 0,0003         | 0,0002             |
| Se (mg/kg)                    | 0,0004                 | 0,0004     | 0,0012     | 0,011      | 0,0016     | 0,0006     | 0,0009     | 0,0008      | 0,00001      | 0,000007      |                   | 0,0002       | 0,00001       |                        | 0,0003     | 0,0004     |                   | 0,0002     | 0,0002      | 0,0003     | 0,0011         | 0,0026             |
| Zn (mg/kg)                    | 0,0005                 | 0,0001     | 0,0002     | 0,0007     | 0,0004     | 0,0005     | 0,00004    | 0,0008      | 0,0004       | 0,0002        |                   | 0,0008       | 0,00002       |                        | 0,0005     | 0,0004     |                   | 0,0003     | 0,00007     | 0,0026     | 0,0005         | 0,0006             |
| Chloride (mg/kg)              | 27,1                   | 26,2       | 33,3       | 85,3       | 35,3       | 36,6       | 65,6       | 41,9        | 3,1          | 12,7          |                   | 11,2         | 22,8          |                        | 17,7       | 23,4       |                   | 12,4       | 15,7        | 25,9       | 29,2           | 20,5               |
| Fluoride (mg/kg)              | 0,04                   | 0,04       | 0,06       | 0,11       | 0,06       | 0,04       | 0,08       | 0,04        | 0,04         | 0,02          |                   | 0,010        | 0,038         |                        | 0,06       | 0,06       |                   | 0,03       | 0,03        | 0,06       | 0,049          | 0,023              |
| Sulfate (mg/kg)               | 5,38                   | 5,93       | 9,04       | 14,4       | 10,2       | 7,5        | 23,7       | 10,8        | 6,5          | 3,2           |                   | 3,4          | 11,7          |                        | 4,9        | 10,4       |                   | 5,5        | 1,8         | 3,3        | 8,1            | 5,3                |
| phenol index                  |                        |            |            |            |            |            |            |             |              |               |                   |              |               |                        |            |            |                   |            |             |            |                |                    |
| pH                            | 11,0                   | 10,8       | 12,7       | 10,6       | 11,8       | 10,2       | 9,6        | 10,2        | 10,0         | 10,0          | 9,6               | 9,4          | 9,2           | 9,2                    | 9,2        | 8,9        | 8,5               | 8,7        | 10,3        | 7,7        | 9,9            | 1,2                |
| Conductivity (mS/m)           | 884                    | 841        | 722        | 686        | 696        | 683        | 754        | 568         | 450          | 434           | 487               | 413          | 475           | 395                    | 231        | 267        | 302               | 219        | 212         | 238        | 498            | 219                |
| L/S                           | 0,037                  | 0,033      | 0,050      | 0,120      | 0,053      | 0,035      | 0,083      | 0,070       | 0,045        | 0,025         | 0,011             | 0,022        | 0,047         | 0,142                  | 0,063      | 0,070      | 0,098             | 0,046      | 0,038       | 0,072      |                |                    |
| L/S (cumulative)              | 0,037                  | 0,070      | 0,12       | 0,24       | 0,29       | 0,33       | 0,41       | 0,48        | 0,53         | 0,55          | 0,56              | 0,58         | 0,63          | 0,77                   | 0,84       | 0,91       | 1,00              | 1,05       | 1,09        | 1,16       |                |                    |

**Table S3b (continued)**  
Precipitation, volume of collected lysimetric water, concentrations of PTEs and anions (dry mass basis), pH and conductivity in lysimetric water from compacted Composite 2.

| Parameter                     | Sampling period (2020) |            |            |            |            |            |            |             |              |               |              |              |               | Sampling period (2021) |            |            |                   |            |             |            | Average result | Standard deviation |
|-------------------------------|------------------------|------------|------------|------------|------------|------------|------------|-------------|--------------|---------------|--------------|--------------|---------------|------------------------|------------|------------|-------------------|------------|-------------|------------|----------------|--------------------|
|                               | 10.6.-23.6.            | 23.6.-1.7. | 1.7.-10.7. | 10.7.-4.8. | 4.8.-25.8. | 25.8.-4.9. | 4.9.-28.9. | 28.9.-6.10. | 6.10.-13.10. | 13.10.-20.10. | 20.10.-4.11. | 4.11.-18.11. | 18.11.-14.12. | 14.12.-11.1.           | 11.1.-5.2. | 5.2.-10.3. | 10.3.-6.5.        | 6.5.-13.5. | 13.5.-20.5. | 20.5.-3.6. |                |                    |
| Precipitation (mm)            | 86                     | 48         | 63         | 182        | 66         | 51         | 120        | 79          | 61           | 28            | 22           | 44           | 45            | 165                    | 66         | 45         | 150               | 47         | 75          | 77         | 76             | 45                 |
| Volume of collected water (L) | 320                    | 310        | 475        | 1100       | 520        | 340        | 740        | 660         | 500          | 310           | 220          | 250          | 480           | 1000                   | 640        | 565        | 950               | 510        | 480         | 680        | 553            | 248                |
| As (mg/kg)                    | 0,0022                 | 0,0027     | 0,0039     | 0,0071     | 0,0033     | 0,0019     | 0,0040     | 0,0043      | 0,0027       | 0,0015        | 0,0012       | 0,0014       | 0,0026        |                        | 0,0022     | 0,0022     |                   | 0,0015     | 0,0008      | 0,0012     | 0,0027         | 0,0015             |
| Ba (mg/kg)                    | 0,0083                 | 0,0086     | 0,015      | 0,0019     | 0,019      | 0,0015     | 0,0001     | 0,018       | 0,015        | 0,0073        | 0,0012       | 0,013        | 0,0036        |                        | 0,0078     | 0,0098     |                   | 0,0008     | 0,0015      | 0,0035     | 0,0080         | 0,0063             |
| Cd (mg/kg)                    | 0,00002                | 0,00002    | 0,00004    | 0,00007    | 0,00005    | 0,00003    | 0,00008    | 0,00008     | 0,00005      | 0,00004       | 0,00002      | 0,00002      | 0,00001       |                        | 0,00005    | 0,00004    |                   | 0,00003    | 0,00003     | 0,00004    | 0,00004        | 0,00002            |
| Cr total (mg/kg)              | 0,0014                 | 0,0016     | 0,0024     | 0,0082     | 0,0023     | 0,0015     | 0,0028     | 0,0030      | 0,0023       | 0,0012        | 0,0007       | 0,0008       | 0,0015        |                        | 0,0015     | 0,0015     |                   | 0,0020     | 0,0031      | 0,0034     | 0,0024         | 0,0017             |
| Cu (mg/kg)                    | 0,76                   | 1,0        | 1,3        | 2,0        | 1,3        | 0,74       | 1,4        | 1,6         | 0,92         | 0,028         | 0,38         | 0,40         | 0,72          |                        | 0,41       | 0,44       |                   | 0,31       | 0,12        | 0,16       | 0,81           | 0,57               |
| Hg (mg/kg)                    | 0,000003               | 0,000003   | 0,000004   | 0,00001    | 0,0003     | 0,000006   | 0,000006   | 0,000006    | 0,000004     | 0,000003      | 0,000002     | 0,000002     | 0,000004      |                        | 0,000006   | 0,00001    |                   | 0,00002    | 0,00008     | 0,000006   | 0,000022       | 0,000064           |
| Mo (mg/kg)                    | 0,018                  | 0,023      | 0,032      | 0,081      | 0,043      | 0,027      | 0,053      | 0,058       | 0,037        | 0,022         | 0,017        | 0,018        | 0,028         |                        | 0,030      | 0,026      | Technical problem | 0,026      | 0,021       | 0,034      | 0,034          | 0,017              |
| Ni (mg/kg)                    | 0,050                  | 0,067      | 0,087      | 0,14       | 0,080      | 0,047      | 0,084      | 0,10        | 0,056        | 0,0051        | 0,023        | 0,023        | 0,043         |                        | 0,023      | 0,024      |                   | 0,018      | 0,0083      | 0,013      | 0,051          | 0,038              |
| Pb (mg/kg)                    | 0,000008               | 0,000008   | 0,00002    | 0,00005    | 0,00002    | 0,0002     | 0,00003    | 0,00003     | 0,00002      | 0,0002        | 0,00002      | 0,00001      | 0,00002       |                        | 0,00003    | 0,0001     |                   | 0,00002    | 0,00003     | 0,00002    | 0,00005        | 0,00006            |
| Sb (mg/kg)                    | 0,00003                | 0,00005    | 0,0001     | 0,0004     | 0,0002     | 0,0001     | 0,0003     | 0,0002      | 0,0001       | 0,00007       | 0,00006      | 0,00007      | 0,00005       |                        | 0,00006    | 0,00007    |                   | 0,00010    | 0,0004      | 0,0006     | 0,0002         | 0,0002             |
| Se (mg/kg)                    | 0,0003                 | 0,0003     | 0,0010     | 0,0095     | 0,0013     | 0,0005     | 0,0006     | 0,0007      | 0,00001      | 0,000008      | 0,000006     | 0,0002       | 0,00001       |                        | 0,00024    | 0,0003     |                   | 0,0002     | 0,0003      | 0,0003     | 0,0009         | 0,0022             |
| Zn (mg/kg)                    | 0,0013                 | 0,0002     | 0,0009     | 0,0070     | 0,0002     | 0,0005     | 0,00003    | 0,0008      | 0,0015       | 0,0015        | 0,0006       | 0,0012       | 0,00027       |                        | 0,0011     | 0,0009     |                   | 0,0001     | 0,0002      | 0,0003     | 0,0011         | 0,0016             |
| Chloride (mg/kg)              | 14,7                   | 19,6       | 32,2       | 71,6       | 22,1       | 24,8       | 57,2       | 32,1        | 3,5          | 15,3          | 9,1          | 8,7          | 18,5          |                        | 16,1       | 17,2       |                   | 15,3       | 12,1        | 17,1       | 23,4           | 17,2               |
| Fluoride (mg/kg)              | 0,04                   | 0,04       | 0,05       | 0,11       | 0,07       | 0,04       | 0,04       | 0,05        | 0,05         | 0,03          | 0,017        | 0,02         | 0,04          |                        | 0,062      | 0,055      |                   | 0,043      | 0,032       | 0,034      | 0,048          | 0,020              |
| Sulfate (mg/kg)               | 3,3                    | 4,4        | 6,8        | 10,5       | 4,7        | 4,0        | 12,1       | 6,9         | 4,3          | 2,7           | 1,9          | 5,4          | 2,8           |                        | 1,3        | 1,6        |                   | 1,5        | 9,2         | 16,6       | 5,8            | 4,2                |
| phenol index                  |                        |            |            |            |            |            |            |             |              |               |              |              |               |                        |            |            |                   |            |             |            |                |                    |
| pH                            | 11,2                   | 11,1       | 13,2       | 12,3       | 10,2       | 10,9       | 10         | 11,7        | 11,7         | 12            | 10,8         | 9,9          | 11,3          | 11,9                   | 12         | 11,8       | 9,7               | 10,9       | 7,8         | 9,5        | 11,0           | 1,2                |
| Conductivity (mS/m)           | 1033                   | 1092       | 1002       | 918        | 677        | 694        | 700        | 720         | 578          | 511           | 549          | 532          | 521           | 544                    | 393        | 427        | 263               | 234        | 207         | 204        | 590            | 270                |
| L/S                           | 0,028                  | 0,027      | 0,041      | 0,095      | 0,045      | 0,030      | 0,064      | 0,057       | 0,043        | 0,027         | 0,019        | 0,022        | 0,042         | 0,087                  | 0,056      | 0,049      | 0,082             | 0,044      | 0,042       | 0,059      |                |                    |
| L/S (cumulative)              | 0,028                  | 0,055      | 0,096      | 0,19       | 0,24       | 0,27       | 0,33       | 0,39        | 0,43         | 0,46          | 0,48         | 0,50         | 0,54          | 0,63                   | 0,68       | 0,73       | 0,81              | 0,86       | 0,90        | 0,96       |                |                    |

Table S3c

Precipitation, volume of collected lysimetric water, concentrations of PTEs and anions (dry mass basis), pH and conductivity in lysimetric water from uncompacted Composite 3.

| Parameter                     | Sampling period (2020) |             |            |            |            |            |            |            |             |              |               |                |              |               | Sampling period (2021) |            |            |            |            |             |            |          | Average results | Standard deviation |
|-------------------------------|------------------------|-------------|------------|------------|------------|------------|------------|------------|-------------|--------------|---------------|----------------|--------------|---------------|------------------------|------------|------------|------------|------------|-------------|------------|----------|-----------------|--------------------|
|                               | 10.6.-17.6.            | 17.6.-23.6. | 23.6.-1.7. | 1.7.-10.7. | 10.7.-4.8. | 4.8.-25.8. | 25.8.-4.9. | 4.9.-28.9. | 28.9.-6.10. | 6.10.-13.10. | 13.10.-20.10. | 20.10.-4.11.4. | 11.4.-18.11. | 18.11.-14.12. | 14.12.-11.1.           | 11.1.-5.2. | 5.2.-10.3. | 10.3.-6.5. | 6.5.-13.5. | 13.5.-20.5. | 20.5.-3.6. |          |                 |                    |
| Precipitation (mm)            | 40                     | 86          | 48         | 63         | 182        | 66         | 51         | 120        | 79          | 61           | 28            | 22             | 44           | 45            | Technical problems     | 165        | 66         | 45         | 150        | 47          | 75         | 77       | 74              | 44                 |
| Volume of collected water (L) | 5,5                    | 100         | 305        | 445        | 940        | 460        | 330        | 550        | 520         | 400          | 280           | 190            | 100          | 400           |                        | 800        | 570        | 575        | 600        | 290         | 240        | 390      | 404             | 228                |
| As (mg/kg)                    | 0,00002                | 0,0008      | 0,0052     | 0,0046     | 0,0025     | 0,0016     | 0,0006     | 0,0009     | 0,0008      | 0,0004       | 0,0001        | 0,00024        | 0,00009      | 0,0002        |                        | 0,00007    | 0,00008    | 0,0002     | 0,00003    | 0,00003     | 0,00003    | 0,00003  | 0,0007          | 0,0012             |
| Ba (mg/kg)                    | 0,00007                | 0,0021      | 0,0045     | 0,032      | 0,039      | 0,0089     | 0,032      | 0,026      | 0,042       | 0,033        | 0,023         | 0,0069         | 0,0040       | 0,011         |                        | 0,053      | 0,073      | 0,0003     | 0,0019     | 0,029       | 0,015      | 0,024    | 0,020           |                    |
| Cd (mg/kg)                    | 0,0000001              | 0,0000      | 0,0000     | 0,00003    | 0,00001    | 0,00004    | 0,000005   | 0,00004    | 0,00005     | 0,00004      | 0,00002       | 0,00002        | 0,000004     | 0,00003       |                        | 0,00003    | 0,00003    | 0,00003    | 0,00001    | 0,000009    | 0,00001    | 0,00002  | 0,00001         |                    |
| Cr total (mg/kg)              | 0,00002                | 0,0007      | 0,0039     | 0,0073     | 0,0034     | 0,0048     | 0,00081    | 0,0025     | 0,0021      | 0,0011       | 0,0005        | 0,0004         | 0,0001       | 0,0005        |                        | 0,0004     | 0,0004     | 0,0004     | 0,0002     | 0,0002      | 0,0004     | 0,0014   | 0,0020          |                    |
| Cu (mg/kg)                    | 0,00002                | 0,0004      | 0,0012     | 0,0010     | 0,0010     | 0,0009     | 0,0002     | 0,0005     | 0,0004      | 0,0002       | 0,0003        | 0,0002         | 0,00005      | 0,0001        |                        | 0,00009    | 0,0001     | 0,0002     | 0,00005    | 0,00005     | 0,00009    | 0,0003   | 0,0003          |                    |
| Hg (mg/kg)                    | 0,0000001              | 0,0000      | 0,0000     | 0,00002    | 0,00004    | 0,00003    | 0,000002   | 0,00004    | 0,000004    | 0,000003     | 0,000004      | 0,000008       | 0,000001     | 0,000006      |                        | 0,000004   | 0,000004   | 0,00004    | 0,000009   | 0,000002    | 0,000003   | 0,00001  | 0,00001         |                    |
| Mo (mg/kg)                    | 0,00009                | 0,0030      | 0,0141     | 0,024      | 0,013      | 0,035      | 0,0037     | 0,030      | 0,040       | 0,027        | 0,016         | 0,013          | 0,0035       | 0,020         |                        | 0,017      | 0,012      | 0,026      | 0,0091     | 0,0070      | 0,015      | 0,017    | 0,011           |                    |
| Ni (mg/kg)                    | 0,000005               | 0,0001      | 0,0003     | 0,0002     | 0,00009    | 0,0002     | 0,00006    | 0,0001     | 0,00009     | 0,00004      | 0,000007      | 0,00003        | 0,000007     | 0,00003       |                        | 0,00001    | 0,00003    | 0,00001    | 0,00001    | 0,00001     | 0,00002    | 0,00005  | 0,00006         |                    |
| Pb (mg/kg)                    | 0,0000002              | 0,0000      | 0,0000     | 0,00002    | 0,00004    | 0,00002    | 0,00001    | 0,00002    | 0,00002     | 0,00001      | 0,00001       | 0,000007       | 0,000004     | 0,00001       |                        | 0,00002    | 0,00002    | 0,00002    | 0,00001    | 0,00001     | 0,00001    | 0,000015 | 0,000008        |                    |
| Sb (mg/kg)                    | 0,000001               | 0,0000      | 0,0001     | 0,00007    | 0,00008    | 0,00007    | 0,00002    | 0,00005    | 0,00004     | 0,00002      | 0,000004      | 0,00002        | 0,000004     | 0,00001       |                        | 0,000004   | 0,000004   | 0,00003    | 0,000002   | 0,000007    | 0,00001    | 0,00003  | 0,00003         |                    |
| Se (mg/kg)                    | 0,000003               | 0,0001      | 0,0004     | 0,0009     | 0,0013     | 0,0008     | 0,0002     | 0,0008     | 0,0007      | 0,0006       | 0,0003        | 0,0002         | 0,00007      | 0,0004        |                        | 0,0003     | 0,0004     | 0,0008     | 0,0002     | 0,0001      | 0,0002     | 0,0005   | 0,0004          |                    |
| Zn (mg/kg)                    | 0,000001               | 0,0000      | 0,0000     | 0,00006    | 0,00004    | 0,0003     | 0,00002    | 0,00002    | 0,0010      | 0,0009       | 0,00001       | 0,00009        | 0,0006       | 0,011         |                        | 0,00008    | 0,0004     | 0,00002    | 0,00002    | 0,000009    | 0,0005     | 0,0003   | 0,0004          |                    |
| Chloride (mg/kg)              | 0,03                   | 1,1183      | 6,1393     | 10,0       | 23,8       | 12,3       | 9,3        | 11,7       | 8,7         | 6,0          | 4,6           | 3,5            | 1,0          | 3,1           |                        | 5,1        | 6,0        | 8,1        | 2,7        | 2,3         | 4,2        | 6,8      | 5,5             |                    |
| Fluoride (mg/kg)              | 0,00                   | 0,0101      | 0,0314     | 0,05       | 0,10       | 0,05       | 0,03       | 0,06       | 0,05        | 0,05         | 0,03          | 0,01           | 0,01         | 0,03          |                        | 0,03       | 0,04       | 0,04       | 0,02       | 0,02        | 0,03       | 0,035    | 0,022           |                    |
| Sulfate (mg/kg)               | 0,01                   | 0,1491      | 0,5230     | 0,66       | 2,6        | 1,03       | 0,49       | 0,82       | 0,93        | 0,60         | 0,42          | 0,28           | 0,15         | 0,60          | 0,85                   | 0,86       | 0,89       | 0,43       | 0,36       | 0,58        | 0,70       | 0,55     |                 |                    |
| phenol index                  |                        |             |            |            |            |            |            |            |             |              |               |                |              |               |                        |            |            |            |            |             |            |          |                 |                    |
| pH                            | 12,2                   | 11,5        | 11,7       | 13,9       | 13,1       | 13,6       | 12,8       | 12,7       | 12,7        | 12,9         | 13,1          | 12,6           | 12,3         | 12,6          | 12,6                   | 12,7       | 12,4       | 12,8       | 12,6       | 12,6        | 12,7       | 0,5      |                 |                    |
| Conductivity (mS/m)           | 430                    | 874         | 1556       | 1865       | 1884       | 1445       | 1544       | 1095       | 1276        | 1181         | 1101          | 1123           | 630          | 1042          | 993                    | 739        | 904        | 712        | 640        | 640         | 649        | 1063     | 413             |                    |
| L/S                           | 0,0004                 | 0,007       | 0,023      | 0,033      | 0,070      | 0,034      | 0,025      | 0,041      | 0,039       | 0,030        | 0,021         | 0,014          | 0,007        | 0,030         | 0,060                  | 0,043      | 0,043      | 0,045      | 0,022      | 0,018       | 0,029      |          |                 |                    |
| L/S (cumulative)              | 0,0004                 | 0,008       | 0,031      | 0,064      | 0,13       | 0,17       | 0,19       | 0,23       | 0,27        | 0,30         | 0,32          | 0,34           | 0,34         | 0,37          | 0,43                   | 0,48       | 0,52       | 0,56       | 0,59       | 0,60        | 0,63       |          |                 |                    |

Table S3c (continued)

Precipitation, volume of collected lysimetric water, concentrations of PTEs and anions (dry mass basis), pH and conductivity in lysimetric water from compacted Composite 3.

| Parameter                     | Sampling period (2020) |                    |                    |            |            |            |            |            |             |              |               |                |            |               | Sampling period (2021) |            |            |            |            |             |            |         | Average results | Standard deviation |         |
|-------------------------------|------------------------|--------------------|--------------------|------------|------------|------------|------------|------------|-------------|--------------|---------------|----------------|------------|---------------|------------------------|------------|------------|------------|------------|-------------|------------|---------|-----------------|--------------------|---------|
|                               | 10.6.-17.6.            | 17.6.-23.6.        | 23.6.-1.7.         | 1.7.-10.7. | 10.7.-4.8. | 4.8.-25.8. | 25.8.-4.9. | 4.9.-28.9. | 28.9.-6.10. | 6.10.-13.10. | 13.10.-20.10. | 20.10.-4.11.4. | 11.-18.11. | 18.11.-14.12. | 14.12.-11.1.           | 11.1.-5.2. | 5.2.-10.3. | 10.3.-6.5. | 6.5.-13.5. | 13.5.-20.5. | 20.5.-3.6. |         |                 |                    |         |
| Precipitation (mm)            | 40                     | 86                 | 48                 | 63         | 182        | 66         | 51         | 120        | 79          | 61           | 28            | 22             | 44         | 45            | 165                    | 66         | 45         | 150        | 47         | 75          | 77         | 74      | 44              |                    |         |
| Volume of collected water (L) | 60                     | 100                | 60                 | 75         | 850        | 325        | 280        | 430        | 520         | 380          | 230           | 125            | 180        | 270           | 600                    | 555        | 575        | 555        | 280        | 325         | 420        | 343     | 213             |                    |         |
| As (mg/kg)                    | 0,0005                 |                    |                    | 0,0001     | 0,0048     | 0,0007     | 0,0007     | 0,0008     | 0,0001      | 0,00006      | 0,00003       | 0,00005        | 0,00006    | 0,00004       |                        | 0,00001    | 0,00003    | 0,00006    | 0,000005   | 0,00002     | 0,000005   | 0,0004  | 0,0011          |                    |         |
| Ba (mg/kg)                    | 0,0011                 |                    |                    | 0,0057     | 0,048      | 0,0084     | 0,018      | 0,0090     | 0,032       | 0,031        | 0,014         | 0,0015         | 0,0036     | 0,0031        |                        | 0,031      | 0,018      | 0,0004     | 0,0026     | 0,018       | 0,011      | 0,014   | 0,014           |                    |         |
| Cd (mg/kg)                    | 0,000001               |                    |                    | 0,000001   | 0,00005    | 0,000006   | 0,00002    | 0,000005   | 0,000007    | 0,000005     | 0,000003      | 0,000002       | 0,000002   | 0,000003      |                        | 0,000007   | 0,000007   | 0,000007   | 0,000004   | 0,000004    | 0,000005   | 0,00001 | 0,00001         |                    |         |
| Cr total (mg/kg)              | 0,0001                 |                    |                    | 0,0002     | 0,011      | 0,0010     | 0,0018     | 0,0010     | 0,0005      | 0,0003       | 0,0001        | 0,0001         | 0,0001     | 0,0001        |                        | 0,0003     | 0,0003     | 0,0003     | 0,0001     | 0,0002      | 0,0002     | 0,0010  | 0,0025          |                    |         |
| Cu (mg/kg)                    | 0,0002                 |                    |                    | 0,00008    | 0,0014     | 0,0004     | 0,0003     | 0,0004     | 0,0001      | 0,00004      | 0,0001        | 0,00003        | 0,00003    | 0,00001       |                        | 0,00002    | 0,00006    | 0,00005    | 0,00001    | 0,00002     | 0,00002    | 0,0002  | 0,0003          |                    |         |
| Hg (mg/kg)                    | 0,000002               |                    |                    | 0,000001   | 0,00004    | 0,00002    | 0,000004   | 0,00002    | 0,00001     | 0,000002     | 0,000001      | 0,000004       | 0,000002   | 0,000002      |                        | 0,000004   | 0,000004   | 0,000004   | 0,000002   | 0,000002    | 0,000003   | 0,00001 | 0,00001         |                    |         |
| Mo (mg/kg)                    | 0,0006                 |                    |                    | 0,0009     | 0,043      | 0,0059     | 0,017      | 0,0043     | 0,0031      | 0,0021       | 0,0011        | 0,0008         | 0,0003     | 0,0006        |                        | 0,0011     | 0,0012     | 0,0019     | 0,0007     | 0,0007      | 0,0013     | 0,005   | 0,010           |                    |         |
| Ni (mg/kg)                    | 0,00008                | Technical problems | Technical problems | 0,00002    | 0,0004     | 0,0001     | 0,00007    | 0,0001     | 0,00003     | 0,00001      | 0,00003       | 0,000007       | 0,000007   | 0,000009      | Technical problems     | 0,000007   | 0,00001    | 0,000019   | 0,000004   | 0,000006    | 0,000005   | 0,00005 | 0,00009         |                    |         |
| Pb (mg/kg)                    | 0,00001                |                    |                    | 0,000002   | 0,00003    | 0,00001    | 0,000009   | 0,00001    | 0,00002     | 0,00001      | 0,000007      | 0,000004       | 0,000006   | 0,000009      |                        | 0,00002    | 0,00002    | 0,00002    | 0,000009   | 0,00001     | 0,00001    | 0,00001 | 0,000012        | 0,000006           |         |
| Sb (mg/kg)                    | 0,000006               |                    |                    | 0,000005   | 0,0001     | 0,00004    | 0,00003    | 0,00003    | 0,00002     | 0,00001      | 0,000006      | 0,000005       | 0,000006   | 0,000007      |                        | 0,000007   | 0,000007   | 0,00001    | 0,00001    | 0,000007    | 0,00001    | 0,00001 | 0,00001         | 0,00002            | 0,00003 |
| Se (mg/kg)                    | 0,00004                |                    |                    | 0,00006    | 0,0019     | 0,0002     | 0,0004     | 0,0002     | 0,00009     | 0,00006      | 0,00005       | 0,00003        | 0,00003    | 0,00004       |                        | 0,00004    | 0,00001    | 0,00005    | 0,0001     | 0,00002     | 0,00002    | 0,00003 | 0,00002         | 0,00004            |         |
| Zn (mg/kg)                    | 0,00006                |                    |                    | 0,0003     | 0,0004     | 0,00006    | 0,00002    | 0,00001    | 0,0013      | 0,0011       | 0,000007      | 0,000004       | 0,0003     | 0,0004        |                        | 0,00006    | 0,0003     | 0,00002    | 0,00001    | 0,00001     | 0,0010     | 0,0003  | 0,0004          |                    |         |
| Chloride (mg/kg)              | 0,26                   |                    |                    | 0,52       | 5,4        | 2,5        | 1,7        | 3,0        | 2,0         | 13,2         | 0,65          | 0,47           | 0,17       | 0,26          |                        | 0,88       | 1,2        | 1,3        | 0,39       | 0,57        | 0,66       | 1,9     | 3,1             |                    |         |
| Fluoride (mg/kg)              | 0,01                   |                    |                    | 0,01       | 0,07       | 0,03       | 0,02       | 0,03       | 0,02        | 0,02         | 0,01          | 0,01           | 0,01       | 0,01          |                        | 0,02       | 0,03       | 0,022      | 0,013      | 0,013       | 0,017      | 0,019   | 0,015           |                    |         |
| Sulfate (mg/kg)               | 0,11                   |                    |                    | 0,09       | 1,1        | 0,41       | 0,35       | 0,54       | 0,66        | 0,48         | 0,29          | 0,16           | 0,23       | 0,34          |                        | 0,70       | 0,73       | 0,70       | 0,35       | 0,41        | 0,53       | 0,45    | 0,25            |                    |         |
| phenol index                  |                        |                    |                    |            |            |            |            |            |             |              |               |                |            |               |                        |            |            |            |            |             |            |         |                 |                    |         |
| pH                            | 12,5                   | 11,6               | 11,6               | 13,7       | 12,7       | 13,3       | 12,5       | 12,4       | 12,2        | 12,3         | 12,7          | 12,2           | 11,4       | 11,9          | 11,9                   | 12,1       | 11,8       | 12,1       | 11,9       | 11,9        | 11,9       | 12,2    | 0,6             |                    |         |
| Conductivity (mS/m)           | 432                    | 1094               | 1110               | 1006       | 722        | 660        | 609        | 489        | 371         | 380          | 312           | 350            | 104,5      | 183           | 168                    | 219        | 189        | 163        | 135        | 135         | 136        | 427     | 324             |                    |         |
| L/S                           | 0,0038                 | 0,0063             | 0,0038             | 0,0047     | 0,054      | 0,021      | 0,018      | 0,027      | 0,033       | 0,024        | 0,015         | 0,008          | 0,011      | 0,017         | 0,038                  | 0,035      | 0,036      | 0,035      | 0,018      | 0,021       | 0,026      |         |                 |                    |         |
| L/S (cumulative)              | 0,0038                 | 0,0101             | 0,014              | 0,019      | 0,072      | 0,093      | 0,110      | 0,14       | 0,17        | 0,19         | 0,21          | 0,22           | 0,23       | 0,25          | 0,28                   | 0,32       | 0,35       | 0,39       | 0,41       | 0,43        | 0,45       |         |                 |                    |         |

**Table S4**

ICP-MS (Agilent 7900) operating parameters for the determination of element concentrations in aqueous leachates.

| Parameter                          | Type/Value               | Helium mode                                                                                                                                           | HECM mode                                                                  | No gas mode                                                                                         |
|------------------------------------|--------------------------|-------------------------------------------------------------------------------------------------------------------------------------------------------|----------------------------------------------------------------------------|-----------------------------------------------------------------------------------------------------|
| <i>Sample introduction</i>         |                          |                                                                                                                                                       |                                                                            |                                                                                                     |
| Nebuliser                          | Micromist                |                                                                                                                                                       |                                                                            |                                                                                                     |
| Spray chamber                      | Scott                    |                                                                                                                                                       |                                                                            |                                                                                                     |
| Skimmer and sampler                | Ni                       |                                                                                                                                                       |                                                                            |                                                                                                     |
| <i>Plasma conditions</i>           |                          |                                                                                                                                                       |                                                                            |                                                                                                     |
| Forward power                      | 1550 W                   |                                                                                                                                                       |                                                                            |                                                                                                     |
| Plasma gas flow                    | 15.0 L min <sup>-1</sup> |                                                                                                                                                       |                                                                            |                                                                                                     |
| Carrier gas flow                   |                          | 1.05 L min <sup>-1</sup>                                                                                                                              | 1.05 L min <sup>-1</sup>                                                   | 1.05 L min <sup>-1</sup>                                                                            |
| Makeup gas flow                    |                          | 0.10 L min <sup>-1</sup>                                                                                                                              | 0.10 L min <sup>-1</sup>                                                   | 0.10 L min <sup>-1</sup>                                                                            |
| He gas flow                        |                          | 4.5 mL min <sup>-1</sup>                                                                                                                              | 10 mL min <sup>-1</sup>                                                    |                                                                                                     |
| QP bias                            |                          | -13.0 V                                                                                                                                               | -93 V                                                                      | -3.0 V                                                                                              |
| OctP bias                          |                          | -18.0 V                                                                                                                                               | -100 V                                                                     | -8.0 V                                                                                              |
| Cell entrance                      |                          | -40 V                                                                                                                                                 | -100 V                                                                     | -30 V                                                                                               |
| Cell exit                          |                          | -60 V                                                                                                                                                 | -150 V                                                                     | -50 V                                                                                               |
| Deflect                            |                          | 1.6 V                                                                                                                                                 | -74 V                                                                      | 11.4 V                                                                                              |
| Plate bias                         |                          | -60 V                                                                                                                                                 | -150 V                                                                     | -35 V                                                                                               |
| Sample uptake rate                 | 0.3 mL min <sup>-1</sup> |                                                                                                                                                       |                                                                            |                                                                                                     |
| <i>Data acquisition parameters</i> |                          |                                                                                                                                                       |                                                                            |                                                                                                     |
| Isotopes monitored                 |                          | <sup>52</sup> Cr, <sup>55</sup> Mn, <sup>56</sup> Fe,<br><sup>60</sup> Ni, <sup>63</sup> Cu, <sup>66</sup> Zn,<br><sup>75</sup> As, <sup>95</sup> Mo, | <sup>78</sup> Se                                                           | <sup>111</sup> Cd, <sup>123</sup> Sb,<br><sup>137</sup> Ba, <sup>201</sup> Hg,<br><sup>208</sup> Pb |
| Isotopes of internal standards     |                          | <sup>72</sup> Ge, <sup>89</sup> Y,<br><sup>103</sup> Rh, <sup>115</sup> In                                                                            | <sup>72</sup> Ge, <sup>89</sup> Y,<br><sup>103</sup> Rh, <sup>115</sup> In | <sup>72</sup> Ge, <sup>89</sup> Y,<br><sup>103</sup> Rh, <sup>115</sup> In                          |

## Quality of analytical data and limits of detection

The quality of the analytical measurements of the PHSs in aqueous leachates and the samples of percolated water from the lysimeters by ICP-MS was checked with an analysis of the standard reference material SPS-SW1 (Reference material for measurements of elements in surface waters) obtained from Spectrapure Standards (Oslo, Norway) and measurements of  $\text{Cl}^-$ ,  $\text{F}^-$  and  $\text{SO}_4^{2-}$  by spectrophotometry, by analysing reference material Anions – While Volume, Merck KGaA (Darmstadt, Germany). The results are provided in Tables 5S–6S.

To check the quality of the determination of total element concentrations in the composite sample by ICP-MS after microwave-assisted digestion, certified reference material CRM 320R Trace Elements in River Sediment (Community Bureau of Reference, Geel, Belgium) was analysed. The results provided in Tables 7S.

The results provided in Tables 5S–7S indicate that the determined concentrations of the elements showed a good correlation with the reported certified values (the agreement between the results was better than  $\pm 5\%$ ), thereby confirming the accuracy of the analytical procedures applied. The expanded uncertainty for the ICP-MS determinations was better than  $\pm 3\%$  ( $k = 2$ ) and for spectrophotometry it was better than  $\pm 5\%$  ( $k = 2$ ).

The limits of detection (LODs) for the determination of elements by ICP-MS and anions by spectrophotometry in aqueous leachates and samples of percolated water from lysimeters as well as the total elemental concentrations by ICP-MS in the composite samples are provided in Table 8S.

**Table S5**

Certified and determined concentrations of PTEs in the standard reference material SPS-SW1 (Reference material for measurements of elements in surface waters) determined by ICP-MS. The results represent the mean concentration obtained from four parallel samples.

| Parameter | Certified value<br>( $\mu\text{g/L}$ ) | Determined<br>( $\mu\text{g/L}$ ) |
|-----------|----------------------------------------|-----------------------------------|
| As        | 10.0 $\pm$ 0.1                         | 9.9 $\pm$ 0.3                     |
| Ba        | 50 $\pm$ 1                             | 49 $\pm$ 1                        |
| Cd        | 0.50 $\pm$ 0.01                        | 0.49 $\pm$ 0.01                   |
| Total Cr  | 2.00 $\pm$ 0.02                        | 1.99 $\pm$ 0.06                   |
| Cu        | 20 $\pm$ 1                             | 19.6 $\pm$ 0.6                    |
| Hg        | /                                      | /                                 |
| Mo        | 10.0 $\pm$ 0.1                         | 10.1 $\pm$ 0.6                    |
| Ni        | 10.0 $\pm$ 0.1                         | 10.0 $\pm$ 0.1                    |
| Pb        | 5.0 $\pm$ 0.1                          | 4.8 $\pm$ 0.1                     |
| Sb        | /                                      | /                                 |
| Se        | 2.00 $\pm$ 0.02                        | 2.02 $\pm$ 0.06                   |
| Zn        | 20 <sup>b</sup>                        | 19.1 $\pm$ 0.6                    |

<sup>b</sup>informative value/not certified

**Table S6**

Concentrations of chlorides, fluorides and sulphates in the standard reference material Anions – While Volume obtained from Merck KGaA (Darmstadt, Germany) determined by spectrophotometry. The results represent the mean concentration obtained from four parallel samples.

| Parameter | Certified<br>( $\text{mg/L}$ ) | Determined<br>( $\text{mg/L}$ ) |
|-----------|--------------------------------|---------------------------------|
| chlorides | 95.0 $\pm$ 9.50                | 93.5 $\pm$ 5.0                  |
| fluorides | 1.17 $\pm$ 0.117               | 1.10 $\pm$ 0.06                 |
| sulphates | 44.3 $\pm$ 4.43                | 42.5 $\pm$ 2.0                  |



**Table S7**

Concentrations of elements in certified reference material CRM 320R (Trace Elements in River Sediment) determined by ICP-MS after microwave-assisted digestion. The results represent the mean concentration from three parallel samples.

| Parameter | Certified<br>(mg/kg) | Determined<br>(mg/kg) |
|-----------|----------------------|-----------------------|
| As        | 21.7±2.0             | 20.4±0.6              |
| Ba        | /                    | /                     |
| Cd        | 2.64±0.18            | 2.52±0.07             |
| Cr        | 59±4                 | 62.7±1.3              |
| Cu        | 46.3±2.9             | 44.2 ±0.9             |
| Hg        | /                    | /                     |
| Mo        | /                    | /                     |
| Ni        | 27.1±2.2             | 26.6±0.6              |
| Pb        | 85±5                 | 81±3                  |
| Sb        | /                    | /                     |
| Se        | /                    | /                     |
| Zn        | 319±20               | 311±7                 |

**Table S8**

LODs for the determination of element concentrations aqueous leachates and lysimetric waters by ICP-MS and anions by spectrophotometry, and determination of the total element concentrations in composite samples by ICP-MS.

| Parameter                     | Aqueous leachates,<br>lysometric water samples<br>(mg/kg) | Composite<br>samples<br>(mg/kg) |
|-------------------------------|-----------------------------------------------------------|---------------------------------|
| As                            | 0.001                                                     | 1.5                             |
| Ba                            | 0.02                                                      | 30                              |
| Cd                            | 0.002                                                     | 3                               |
| Total Cr                      | 0.002                                                     | 3                               |
| Cu                            | 0.001                                                     | 1.5                             |
| Hg                            | 0.001                                                     | 1.5                             |
| Mo                            | 0.002                                                     | 3                               |
| Ni                            | 0.002                                                     | 3                               |
| Pb                            | 0.005                                                     | 7.5                             |
| Sb                            | 0.001                                                     | 1.5                             |
| Se                            | 0.003                                                     | 4.5                             |
| Zn                            | 0.005                                                     | 1.5                             |
| Cl <sup>-</sup>               | 2                                                         | /                               |
| F <sup>-</sup>                | 1                                                         | /                               |
| SO <sub>4</sub> <sup>2-</sup> | 10                                                        | /                               |

**Table S9**

Total concentrations of PTEs in raw materials after microwave-assisted digestion determined by ICP-MS. The expanded uncertainty of the analytical procedure was better than  $\pm 3\%$  ( $k = 2$ ).

| Parameter<br>(mg/kg) | Paper-<br>mill<br>sludge | Foundry<br>sand | Paper<br>ash | Coal ash | Solid-waste<br>incineration<br>bottom ash | Foundry<br>slag | Digestate | Mine<br>waste |
|----------------------|--------------------------|-----------------|--------------|----------|-------------------------------------------|-----------------|-----------|---------------|
| As                   | 0.39                     | 5.8             | 1.3          | 3.0      | 11                                        | 8.37            | 17        | 4.1           |
| Ba                   | 17                       | 268             | 65           | 332      | 2708                                      | 246             | 600       | 157           |
| Cd                   | 0.31                     | 0.45            | 0.14         | 0.50     | 44                                        | 1.5             | 1.3       | 0.27          |
| Cr                   | 28                       | 70              | 55           | 2        | 600                                       | 234             | 350       | 42            |
| Cu                   | 7.2                      | 31              | 88           | 352      | 1500                                      | 35              | 600       | 10            |
| Hg                   | 0.31                     | 1.1             | 0.2          | 0.2      | 12                                        | 1.2             | /         | 0.6           |
| Mo                   | 2.7                      | 4.0             | 3.4          | 3.0      | 160                                       | 7.2             | 19        | 7.9           |
| Ni                   | 6.4                      | 23              | 9.4          | 12       | 113                                       | 32              | 130       | 15            |
| Pb                   | 12                       | 32              | 17           | 76       | 1115                                      | 47              | 390       | 17            |
| Sb                   | 0.20                     | 2.6             | 0.63         | 1.4      | 120                                       | 4.9             | 9.5       | 0.71          |
| Se                   | 20                       | 9.3             | 3.9          | 4.0      | 8.0                                       | 8.0             | 1.3       | 18            |
| Zn                   | 20                       | 3680            | 48           | 100      | 14734                                     | 2646            | 680       | 47            |

**Table S10**

Total concentrations of PTEs in composites after microwave-assisted digestion determined by ICP-MS. The results represent the mean concentration obtained from three parallel samples.

| Element | Composite 1<br>(mg/kg) | Composite 2<br>(mg/kg) | Composite 3<br>(mg/kg) |
|---------|------------------------|------------------------|------------------------|
| As      | 10.8                   | 3.90                   | 3.10                   |
| Ba      | 911                    | 431                    | 138                    |
| Cd      | 2.03                   | 0.5                    | 0.10                   |
| Cr      | 150                    | 125                    | 76.2                   |
| Cu      | 171                    | 334                    | 20.4                   |
| Hg      | 0.69                   | 0.22                   | 0.02                   |
| Mo      | 18.8                   | 5.63                   | 3.62                   |
| Ni      | 85.3                   | 36.7                   | 20.3                   |
| Pb      | 123                    | 356                    | 15.4                   |
| Sb      | 6.44                   | 10                     | 0.88                   |
| Se      | 1.95                   | 0.906                  | 0.823                  |
| Zn      | 1140                   | 313                    | 510                    |

**Table S11**

Concentrations of PTEs and anions in aqueous leachates from raw materials applying the SIST EN 1744-3:2002 leaching test. Limits for inertness, set by the current Slovenian legislation, are also given. Values highlighted with red exceed the threshold values for inertness. pH and electrical conductivity of aqueous leachates are also given. The expanded uncertainty of analytical procedure was better than  $\pm 3\%$  ( $k = 2$ ).

| Sample/<br>Parameter                  | Paper-<br>mill<br>sludge | Foundry<br>sand | Paper<br>ash | Digestate | Solid-waste<br>incineration<br>bottom ash | Foundry<br>slag | Coal ash | Mine<br>waste | Limit<br>value* |
|---------------------------------------|--------------------------|-----------------|--------------|-----------|-------------------------------------------|-----------------|----------|---------------|-----------------|
| As (mg/kg)                            | 0.07                     | 0.17            | 0.004        | 0.11      | 0.007                                     | 0.06            | 0.003    | 0.0007        | 0.1             |
| Ba (mg/kg)                            | 0.4                      | <0.02           | 63           | 2         | 1.6                                       | 0.11            | 48       | 0.0073        | 5               |
| Cd (mg/kg)                            | <0.002                   | <0.002          | <0.002       | 0.014     | <0.002                                    | <0.002          | <0.002   | <0.002        | 0.025           |
| Cr (mg/kg)                            | 0.006                    | <0.002          | 0.032        | 0.26      | 7.4                                       | 0.013           | 0.16     | 0.0022        | 0.5             |
| Cu (mg/kg)                            | 0.18                     | 0.026           | 0.79         | 8.2       | <0.001                                    | 0.012           | 0.003    | 0.0006        | 0.5             |
| Hg (mg/kg)                            | <0.001                   | <0.001          | 0.003        | 0.0099    | 0.005                                     | 0.002           | 0.001    | <0.000<br>1   | 0.005           |
| Mo (mg/kg)                            | 0.15                     | 0.16            | 0.77         | 1.2       | 8.3                                       | 0.013           | 0.17     | 0.0065        | 0.5             |
| Ni (mg/kg)                            | 0.11                     | 0.015           | 0.002        | 1.3       | 0.002                                     | 0.004           | <0.002   | 0.0010        | 0.4             |
| Pb (mg/kg)                            | 0.005                    | <0.005          | 0.051        | 1.7       | <0.005                                    | <0.005          | 0.054    | <0.000<br>5   | 0.5             |
| Sb (mg/kg)                            | 0.014                    | 0.02            | 0.002        | 5         | 1.1                                       | 0.073           | 0.077    | 0.0001        | 0.3             |
| Se (mg/kg)                            | 0.004                    | 0.06            | 0.003        | 0.017     | 0.15                                      | 0.026           | 0.031    | 0.0004        | 0.6             |
| Zn (mg/kg)                            | 0.18                     | 0.03            | 0.043        | 10        | <0.005                                    | <0.005          | 0.23     | 0.0016        | 2               |
| Cl <sup>-</sup> (mg/kg)               | 89                       | 116             | 59.8         | 3440      | 5830                                      | 473             | 438      | 27            | 800             |
| F <sup>-</sup> (mg/kg)                | 19                       | 22              | 7.44         | 17.2      | 26.8                                      | 5.39            | 5.69     | 0.44          | 10              |
| SO <sub>4</sub> <sup>2-</sup> (mg/kg) | 290                      | 580             | <10          | 5860      | 1000                                      | 2000            | <10      | 9             | 1000            |
| Phenolic index<br>(mg/kg)             | 0.25                     | <0.05           | 3.6          | 30        | <0.20                                     | <0.05           | 3.6      | <0.05         | 0.1             |
| pH                                    | 7.3                      | 10.0            | 12.5         | 9.2       | 11.1                                      | 9.4             | 12.3     | 8.6           | /               |
| Conductivity (mS/m)                   | 62                       | 55              | 988          | 293       | 522                                       | 56              | 1164     | 16            | /               |

\* Decree on waste (Official Gazette of the Republic of Slovenia, nos. 37/15, 69/15 and 129/20)

**Table S12**

Concentrations of PTEs and anions in aqueous leachates from three uncompacted and compacted Composites 1, 2 and 3, applying SIST EN 1744-3:2002 leaching test. Results represent average concentrations of elements and anions obtained from three analysed samples for each composite. Limits for inertness, set by the current Slovenian legislation, are also provided. Values highlighted with red exceed the threshold values for inertness. pH and electrical conductivity of aqueous leachates are also given. The expanded uncertainty of analytical procedure was better than  $\pm 3\%$  ( $k = 2$ ).

| Sample/<br>Parameter                  | Composite 1 |           | Composite 2 |           | Composite 3 |           | Limit<br>value* |
|---------------------------------------|-------------|-----------|-------------|-----------|-------------|-----------|-----------------|
|                                       | Uncompacted | Compacted | Uncompacted | Compacted | Uncompacted | Compacted |                 |
| As (mg/kg)                            | 0.033       | 0.028     | 0.072       | 0.039     | 0.0023      | <0.001    | 0.1             |
| Ba (mg/kg)                            | 0.337       | 0.32      | 2.74        | 1.52      | 39.3        | 2.15      | 5               |
| Cd (mg/kg)                            | <0.002      | <0.002    | <0.002      | <0.002    | <0.002      | <0.002    | 0.025           |
| Cr (mg/kg)                            | 0.029       | 0.01      | 0.062       | 0.02      | 0.095       | 0.017     | 0.5             |
| Cu (mg/kg)                            | 0.048       | 0.03      | 2.85        | 4.8       | 0.0043      | 0.0017    | 0.5             |
| Hg (mg/kg)                            | <0.001      | <0.001    | 0.0017      | 0.0017    | 0.0023      | <0.001    | 0.005           |
| Mo (mg/kg)                            | 0.0667      | 0.062     |             | 0.65      | 0.293       | 0.023     | 0.5             |
| Ni (mg/kg)                            | 0.023       | 0.013     | 0.49        | 0.58      | <0.002      | <0.002    | 0.4             |
| Pb (mg/kg)                            | <0.005      | <0.005    | 0.01        | <0.005    | 0.053       | <0.005    | 0.5             |
| Sb (mg/kg)                            | 0.0080      | 0.004     | 0.061       | 0.004     | 0.0023      | 0.0037    | 0.3             |
| Se (mg/kg)                            | 0.0050      | 0.0057    | 0.0083      | 0.079     | 0.015       | 0.0047    | 0.6             |
| Zn (mg/kg)                            | 0.067       | 0.058     | 0.125       | 0.0057    | 0.0650      | 0.0060    | 2               |
| Cl <sup>-</sup> (mg/kg)               | 274         | 323       | 1210        | 267       | 568         | 51.8      | 800             |
| F <sup>-</sup> (mg/kg)                | 5.3         | 7.1       | 10.6        | 8.7       | 6           | 0.7       | 10              |
| SO <sub>4</sub> <sup>2-</sup> (mg/kg) | 563         | 543       | 2667        | 273       | 137         | 137       | 1000            |
| Phenolic index<br>(mg/kg)             | 0.054       | <0.01     | 7.9         | 0.42      | <0.01       | <0.01     | 0.1             |
| pH                                    | 8.0         | 8.3       | 10.8        | 11.6      | 12.4        | 11.6      | /               |
| Conductivity<br>(mS/m)                | 292         | 193       | 562         | 681       | 1158        | 495       | /               |

\* Decree on waste (Official Gazette of the Republic of Slovenia, nos. 37/15, 69/15 and 129/20)
