# Supplementary material for: Environmental Acceptability of Geotechnical Composites from Recycled Materials: Comparative Study of Laboratory and Field Investigations
Source: Int J Environ Res Public Health. 2023 Jan 21;20(3):2014. doi: 10.3390/ijerph20032014 (PMC9915455; doi:10.3390/ijerph20032014)
Supplement: Supplementary file 1 [file ijerph-20-02014-s001.zip]

Archive with 11 entries (11 files):
- Figure 1S.pdf
- Figure s2.pdf
- Figure s3.pdf
- Figure s4a.pdf
- Figure s4b.pdf
- Figure s4C.pdf
- Figure s5.pdf
- Figure s6.pdf
- Figure s7.pdf
- Figure s8.pdf
- Tables Supplementary.pdf
