# Supplementary figures and images for: Environmental Acceptability of Geotechnical Composites from Recycled Materials: Comparative Study of Laboratory and Field Investigations
Source: MDPI journal article supplement (doi:10.3390/ijerph20032014), 2023-01-21

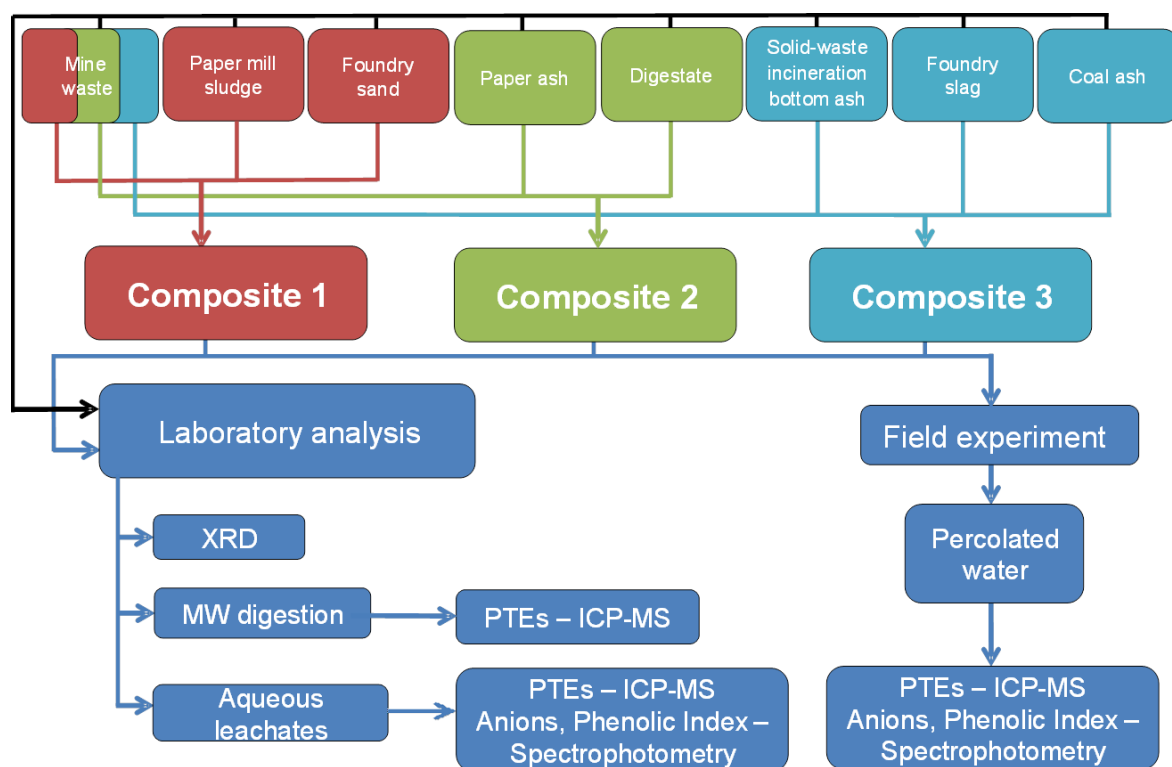

**Figure S1** A flow chart of the experimental set-up.

Supplement: s1 [file s1]
